# Supplementary material for: The Importance of Stromal Endometriosis in Thoracic Endometriosis
Source: Cells. 2021 Jan 18;10(1):180. doi: 10.3390/cells10010180 (PMC7831500; doi:10.3390/cells10010180)
Supplement: Supplementary file 1 [file cells-10-00180-s001.zip › cells-1059106 supp.xlsx]

## Sheet: Tabelle1
																			Pelvic
CPE group	Ref	Journal	Case No	Age	Symptoms			Smoker	Pneumothorax Episodes	Pelvic Pain etc.	Detection				Diaphragm	Nodules/Fibrosis			Endometriosis	Thoracic EM	Thoracic EM	Thoracic EM				Diagnosis	Therapy	Recurrence
					Chest Pain	Dyspnea (shortness of breath)	Cough		Past History	others	Chest X-Ray	CT	VATS	MRI		(parietal) pleura	Visceral pleura	Lung (s)	Ovary, PE, DIE, Adenomyosis	Diaphragm	Pleura	Lung	Classification	Markers	Hemosiderin
	Sugimura et al. [62]	Lancet 2019, 394, 952	1	41	1	1	0	n.s.	yes	n.s.	0	1	thoracoscopy	0	blueberry spots	red lesions	0	0	n.s.	1	1	0	stromal	CD10, ER, PR	0	CP, right-sided	sheets of polyglycolic acid and fibrin glue, buserelin	recurrence after 2,4 months
	Shresta et al. [63]	Heart Lung Circ 2019, 28, 850-857	1	43	n.s.	n.s.	n.s.	n.s.	3	n.s.	0	0	1	0	Fenestration, central tendon	purple nodules	0	small bleb in middle lobe	1	0	0	0	0	CD10, ER, PR	0	CP, n.s.	talc pleurodesis	not after 12 months
			2	44	n.s.	n.s.	n.s.	n.s.	4	n.s.	0	0	1	0	Fenestration/central tendon, nodules (purple, black)		0	blebs	0	0	0	0	0	CD10, ER, PR	0	CP, n.s.	talc pleurodesis	not after 11 months
			3	40	n.s.	n.s.	n.s.	n.s.	3	n.s.	0	0	1	0	Fenestration/ central tendon/Blebs	0	0	blebs	0	0	0	0	0	CD10, ER, PR	0	CP, n.s.	talc pleurodesis	not after 57 months
			4	50	n.s.	n.s.	n.s.	n.s.	3	n.s.	0	0	1	0	0	dark nodules	0	blebs	0	0	1	0	glands/stroma	CD10, ER, PR	0	CP, n.s.	done after recurrence talc pleurodesis	recurrence after 2 months, then not for 45 months
			5	36	n.s.	n.s.	n.s.	n.s.	2	n.s.	0	0	1	0	Fenestration central tendon	0	0	blebs	1	0	0	0	0	CD10, ER, PR	0	CP, n.s.	talc pleurodesis	not after 1 month
50 Neg. ctrls	Mataca et al. [29]	Int J Surg Pathol 2019, 27, 593-597	1	26	1	1	1	1	n.s.	abdominal	1	0	1	0	Fenestration	Blebs, fibrosis	inflammation	cysts	OV cyst, right-sided	0	1	0	stromal	CD10, ER, PR, neg for Pan-CK and HMB45	0	CP, right-sided	pleurodesis	n.s.
			2	28	1	1	0	0	1	0	1	0	1	0	0	Blebs, inflammation	0	0	OV cyst, right-sided	0	1	0	stromal	CD10, ER, PR, neg for Pan-CK and HMB45	0	CP, right-sided	pleurodesis	n.s.
			3	25	1	0	0	0	0	0	1	0	1	0	0	Blebs, inflammation	0	0	0	0	1	0	stromal	CD10, ER, PR, neg for Pan-CK and HMB45	0	CP, right-sided	pleurodesis	n.s.
pregnant woman	Yasuda et al. [64]	Taiwan J Obstet Gynecol 2018, 57, 449-451	1	35	0	1	0	n.s.	1	back pain (pregnant)	1	1	1	0	red spots, thinning	red spots	0	0	OV cyst (Left-sided), Pouch of Douglas, Fallopian tube, Uterus with bulla	0	1	0	glands/stroma/decidual changes	ER, PR	0	CP, right-sided	chemical pleurodesis	not after 3 months (delivery pos.)
men with SP	Kawaguchi et al. [30]	J Thorac Dis 2018, 10, 3468-3472	5	29	n.s.	n.s.	n.s.	n.s.	5	n.s.	0	0	5	0	5	0	1	0	n.s.	0	1	0	(n=1) glands, stroma	ER, PR, CD10	0	CP, right-sided (5)	hormonal	62,5% of 4 or 5 cases
			50 ctrls		all (8-62)			15 smokers											PE (n=5/55)				(n=4) stromal	ER, PR, CD10	0 (n=4)		resection
VAS scores	Maniglio et al. [34]	Radiol Case Rep 2018, 13, 81-85	1	37	1	1	1	n.s.	n.s.	Dysmenorrhea (VAS 9), Dyspareunia (VAS 8), Dyschezia (VAS 7), Chronic abdominal pain (VAS 4), infertile	1	1	1	0	0	brown, white lesions	dito	blebs, bullae	OV Cyst, intestine, bladder, abdominal wall		1	1	glands/stroma	ER	0	CP, left-sided	chemical pleurodesis	recurrent after 60 months
																											GnRH
	Takahashi et al. [65]	Ann Thorac Surg 2017, 23, 108-112	1	33	1	0	0	0	0	n.s.	1	1	thoracoscopy	0	0	0	bullae, cysts EM	0	PE	0	1	0	stromal	ER, PR, CD10	0	CP, left-sided	resection	n.s.
	Yukumi et al. [66]	Intern Med 2016, 55, 3491-3493	1	15	1	1	0	n.s.	n.s.	0	1	1	1	0	nodules yellow	0	nodules white	blebs apical	0	0	0	1	stromal	PR	0	CP, left-sided	resection, pleurodesis	recurrence after 22 d, then not after 12 months
			1	20	n.s.	n.s.	n.s.	n.s.	n.s.	n.s.	0	1	1	0	nodules red	0	nodules white	blebs apical	n.s.	1	0	1	stromal	PR, ER, CD10	0	CP, left-sided	resection, GnRH	not after 6 months
	Ghigna et al. [67]	Ann Diag Pathol 2015, 19, 320-325	18	32.5	18	18	18	n.s.	yes	n.s.	18	0	18 thoracoscopy	0	14 (perforation, brown plaques)	2 nodules	2 nodules	n=6 blebs, N=8 Fibrosis	2/18 PE	14	2	2	N=8 stromal/glands	all ER, PR, CD10-pos	n=18 inflammation	n=9 CP, n=9 non-CP, all right-sided		n.s.
					32,5±8,23													N=18 inflammation					N=10 stromal	SMA, HMB45
	Ichiki et al. [68]	Asian J Surg 2015, 38, 180-185	3	40	n.s.	n.s.	n.s.	n.s.	yes	n.s.	0	0	1	0	fenestration, blueberry spots	bulla	0	0	0	0	1	0	stromal	ER	1	SP (CP), right-sided	resection, chemical pleurodesis after recurrence	yes, after 3 months, not after 47 months
				28	n.s.	n.s.	n.s.	n.s.	yes	n.s.	0	0	1	0	blueberry spot-like lesions	white change	0	0	0	0	1	0	stromal	ER	1	SP (CP), right-sided	resection, chemical pleurodesis after recurrence	yes, after 3 months, not for 35 months
				23	n.s.	n.s.	n.s.	n.s.	yes	n.s.	0	0	1	0	blueberry spot-like lesions	white change	0	0	PE	1	0	0	stromal	ER	1	SP (CP), right-sided	chemical pleurodesis, hormonal treatment	not after 15 months
															Cave: Text and Table are differing
	Nemeş et al. [69]	Rom J Morphol Embryol 2015, 56, 295-300	1	36	1	1	0	n.s.	1	Dysmenorrhea, infertile	1	1	1	1 post-operatively for endometriosis	fenestrations, red and blueberry spots	spots (white, brown)	spots (white, brown)	0	n.s.	1	1	0	glands/stroma	PR, ER, CK7		CP, right-sided	drainage, GnRH	not after 4 months
	Inoue et al. [70]	J Cardiothorac Surg 2015, 10, 83	1	41	n.s.	n.s.	n.s.	n.s.	n.s.	n.s.	n.s.	n.s.	n.s.	n.s.	1	0	0	0	0	0	0	0	0		0	CP right-sided	n.s.	n.s.
			2	53	n.s.	n.s.	n.s.	n.s.	n.s.	n.s.	n.s.	n.s.	n.s.	n.s.	1	0	0	0	0	0	0	0	0		0	CP right-sided	n.s.	n.s.
			3	47	n.s.	n.s.	n.s.	n.s.	n.s.	n.s.	n.s.	n.s.	n.s.	n.s.	1	0	0	0	0	0	0	0	0		0	bilateral	n.s.	n.s.
			4	29	n.s.	n.s.	n.s.	n.s.	n.s.	n.s.	n.s.	n.s.	n.s.	n.s.	1	0	0	0	0	1	0	0	pos		0	CP right-sided	n.s.	n.s.
			5	37	n.s.	n.s.	n.s.	n.s.	n.s.	n.s.	n.s.	n.s.	n.s.	n.s.	1	0	0	0	0	1	0	0	pos		0	CP right-sided	n.s.	n.s.
			6	44	n.s.	n.s.	n.s.	n.s.	n.s.	n.s.	n.s.	n.s.	n.s.	n.s.	1	0	0	0	0	1	0	0	pos		0	CP right-sided	n.s.	n.s.
			7	50	n.s.	n.s.	n.s.	n.s.	n.s.	n.s.	n.s.	n.s.	n.s.	n.s.	1	0	0	0	0	0	0	0	0		0	CP right-sided	n.s.	n.s.
			8	44	n.s.	n.s.	n.s.	n.s.	n.s.	n.s.	n.s.	n.s.	n.s.	n.s.	1	0	0	0	0	1	0	0	pos		0	CP right-sided	n.s.	n.s.
			9	43	n.s.	n.s.	n.s.	n.s.	n.s.	n.s.	n.s.	n.s.	n.s.	n.s.	1	0	0	0	0	0	0	0	0		0	CP right-sided	n.s.	n.s.
			10	18	0	1	0	n.s.	n.s.	0	1	1	n.s.	n.s.	0	red spots	red spots	0	0	0	1	0	glands/stroma	CD10	1	CP left-sided	n.s.	not, n. s. how long
			11	33	n.s.	n.s.	n.s.	n.s.	n.s.	n.s.	n.s.	n.s.	n.s.	n.s.	1	0	0	0	0	0	0	0	0		0	CP right-sided	n.s.	ns.
			12	45	n.s.	n.s.	n.s.	n.s.	n.s.	n.s.	n.s.	n.s.	n.s.	n.s.	1	0	0	0	0	0	0	0	0		0	CP right-sided	n.s.	ns.
			13	38	n.s.	n.s.	n.s.	n.s.	n.s.	n.s.	n.s.	n.s.	n.s.	n.s.	1	0	0	0	0	0	0	0	0		0	CP right-sided	n.s.	ns.
	Kawaguchi et al. [71]	Ann Thorac Surg 2015, 99, 1075-1078	1	24	1	1	0	n.s.	n.s.	n.s.	1	1	1	0	0	0	0	1 bulla	n.s.	0	0	1	glands/stroma	ER, PR	0	CP, right-sided	resection, hormonal	not for 7 months
			2	34	0	1	1	n.s.	n.s.	n.s.	1	1	1	0	0	0	0	1 bulla	n.s.	0	0	1	glands/stroma	ER, PR	0	CP, right-sided	resection, hormonal	not for 3 months
			3	22	1	0	0	n.s.	n.s.	n.s.	1	1	1	0	0	0	0	1 bulla	n.s.	0	0	1	stromal	ER, PR-pos	0	CP, right-sided	resection, hormonal	not for 37 months
	Legras et al. [72]	Chest 2014, 145, 354-360	54	40	n.s.	ns.	n.s.	17	3	n.s.	0	0	17	0	33	26	15	0	19/40 PE	40	10	0	25 gland/stroma, 3 gland, 15 stroma	ER, PR, CD10	21 hemosiderin	39 CP, right-sided, 1 bilateral	resection	n.s.
			36,5 (31-41)	14	n.s.	n.s	n.s.	8	3	n.s.	0	0	8	0	10	7	4	0	2/14 PE	12	2	0	8 gland/stroma, 6 stroma	ER, PR, CD10	6 hemosiderin	12 Non-CP right-sided, 2 left-sided, 2 bilateral	resection	n.s.
			36,5 (33-42)
Male controls	Haga et al. [27]	Path Int 2013, 63, 429-434	84	37.4	n.s.	n.s.	n.s.	6	n.s.	n.s.	0	0	84	0	n=71 holes, n=31 nodules	0	0	0	48/84 PE	84	0	0	N=21 glands/stroma	ER, PR, CD10, SMA		83 right-sided, n=1 left-sided	n.s.	n.s.
				(24-50)																			N=63 stromal; n=1 with SMC;	Stroma - ER in 74, PR in 84, CD10 in 74, SMA in 46	N=19 with hemorrhage
			37,4±5,4
	Higuchi et al. [73]	Fukushima J Med Sci 2012, 58, 74-	1	40	0	1	0	n.s.	1	0	1	1	1	0	porous lesion	0	0	ground-glass opacity (lung cancer)	n.s.	1	0	0	stromal	CD10	0	right CP	resection	not after 48 months
	Fang et al. [74]	Respir Care 2012, 57, 1182-1185	1	45	0	0	1 with blood sputum	n.s.	several	anemia, loss of appetite, general weakness	1	1	0	0	cyts	0	0	nodules cystic	sigmoid colon	0	1	1	glands, stroma (Decidual-like9	CD10, CK7, CK20-neg, CEA-neg	inflammation	CP bilateral	resection	not after 12 months
															cystic lesions bilateral behind the diaphragm	0
	Poh et al. [75]	J Obstet Gynaecol 2011, 31, 452-458	1	41	1	1	0	n.s.	n.s.	0	1	0	1	0	0	Blebs (Fibrosis, adhesion, hemosiderin)	0	Cysts in both lobes (Fibrosis and inflammation)	n.s.	0	0	1 (both lobes)	stromal	CD10, ER, PR	1	CP, bilateral	resection, talc pleurodesis	n.s.
VAS scores	Kumakiri et al. [33]	J Minim Invasive Gynecol 2010, 17, 593-599	1	31	n.s.	n.s.	n.s.	n.s.	4	VAS 8	0	0	1	0	red/white	0	1	0	N=3 with Ov. endometrioma	1	0	0	stroma	CD10, ER, PR	0	CP right-sided	hormonal	recurrence
			2	45	n.s.	n.s.	n.s.	n.s.	3	VAS 5	0	0	1	0	black	0	1	0	N=1 adenomyosis	unclear	0	0	0	CD10, ER, PR	1	CP right-sided	hormonal	n.s.
			3	46	n.s.	n.s.	n.s.	n.s.	3	VAS 2	0	0	1	0	red, white, black	0	1	0	N=3 of PE during VATS	1	0	0	stroma	CD10, ER, PR	0	CP right-sided	hormonal	n.s.
			4	38	n.s.	n.s.	n.s.	n.s.	1	Vas 7	0	0	1	0	black, white	0	0	0		1	0	0	stroma	CD10, ER, PR	0	CP right-sided	hormonal	n.s.
			5	30	n.s.	n.s.	n.s.	n.s.	10	VAS 8	0	0	1	0	red, white, black	0	1	0		1	0	0	stroma/gland	CD10, ER, PR	0	CP right-sided	hormonal	recurrence
			6	46	n.s.	n.s.	n.s.	n.s.	3	VAS 5	0	0	1	0	red, white	0	1	0		1	0	0	stroma	CD10, ER, PR	0	CP right-sided	hormonal	recurrence
			7	51	n.s.	n.s.	n.s.	n.s.	6	VAS 2	0	0	1	0	black	0	0	0		1	0	0	stroma/gland	CD10, ER, PR	0	CP right-sided	hormonal	n.s.
			8	40	n.s.	n.s.	n.s.	n.s.	2	VAS 0	0	0	1	0	black, white	0	1	0		1	0	0	gland	CD10, ER, PR	0	CP right-sided	hormonal	n.s.
			9	47	n.s.	n.s.	n.s.	n.s.	1	VAS 3	0	0	1	0	white	0	0	0		unclear	0	0	0	CD10, ER, PR	1	CP right-sided	hormonal	n.s.
			10	43	n.s.	n.s.	n.s.	n.s.	2	VAS 9	0	0	1	0	black, white	0	0	0		1	0	0	stroma/gland	CD10, ER, PR	0	CP right-sided	hormonal	n.s.
			11	43	n.s.	n.s.	n.s.	n.s.	3	VAS 10	0	0	1	0	red, black, white	0	1	0		1	0	0	gland	CD10, ER, PR	0	CP right-sided	hormonal	n.s.
only case with ER-neg	Kim et al. [76]	Thorac Cardiov Surg 2010, 58, 429-435	1	34	0	1	0	0	0	0	1	0	0	0	bullous nodules	0	0	0	n.s.	1 deciduosis	0	0	Deciduosis	ER-neg, PR-pos	0	Non-CP right-sided	resection, fibrin glue, meshes	delivery after 6 months
pregnant case
	Kumakiri et al. [77]	Fertil Steril 2008, 90, 1200.e11	1	30	1	1	0	n.s.	3	0	1	0	0	0	fenestration, scattered lesions (red/black)	0	1	0	OV, DIE in the cul-de-sac	1	0	0	stromal	CD10, ER, PR	0	CP right-sided	resection, pleurodesis, hormonal	3 recurrences in 3 months
	Morcos et al. [78]	Ann Thorac Surg 2006, 82, 726-729	1	29	1	1	0	n.s.	2	n.s.	1	1	thoracotomy	0	1 cyst	1 multiple cysts, blue-brown lesions	1 blue-brown lesions	1 bulla	0	1	1	1	glands/stroma and stroma in pleura and peritoneum of the diaphragm	ER, PR	0	CP right-sided	resection, hormonal	not after 8 months
	Korom et al. [79]	J Thorac Cardiovasc Surg 2004, 128, 502-508	3	31	n.s.	n.s.	n.s.	n.s.	1	n.s.	0	0	1	0	multiple perforations	bulla	0	0	0	1	0	0	0		0	CP, right-sided	resection	not after 22 months
				32	n.s.	n.s.	n.s.	n.s.	2	n.s.	0	0	1	0	multiple perforations and purple nodules	0	0	0	PE	1	0	0	stroma/glands	CD10	1 (inflammation)	CP, right-sided	talc, hormonal	recurrent, then not for 17 months
				39	n.s.	n.s.	n.s.	n.s.	1	n.s.	0	0	1	0	multiple perforations and purple deposits	0	0	0	0	1	0	0	pos		0	CP, right-sided	plication, resection, talc	not for 13 months
	Fukunaga [80]	APMIS 1999, 107, 685-688	1	40	1	1	0	n.s.	n.s.	n.s.	1	1	thoracotomy	0	brown spots, bloody effusion	0	0	0	0	1	0	0	stromal	ER, PR, Vim-pos, CK-neg		CP, right-sided	resection, hormonal	not for 6 months
	Tsunezuka et al. [81]	Respiration 1999, 66, 470-472	1	40	1	0	1	0	n.s.	n.s.	1	1	0	1	nodules red and black spots	1	0	0	n.s.	1	0	0	stroma/glands	CA125		CP, right-sided	resection	not for 15 months
	Flieder et al. [26]	Hum Pathol 1998, 29, 1495-1503	4 CP	38	1	1	1	n.s.	yes	n.s.	1	0	0	0	0	1 nodule	0	0	1 PE	0	1	0	stroma/glands	CK7, CEA, EpCam, B72.3, Leu-M1, Vim, Desmin, Actin, SMA, ER, PR,	1	CP, right-sided	n.s.	not for 5 years
			6 HP	38	0	1	0	n.s.	yes	n.s.	1	0	0	0	0	0	1 nodule, cyst	0	0	0	1	0	stroma/glands	CK7, CEA, EpCam, B72.3, Leu-M1, Vim, Desmin, Actin, SMA, ER, PR,	1	CP, right-sided	n.s.	not for 7 years
				34	0	1	0	n.s.	yes	n.s.	1	0	0	0	0	0	1 cyst	1	0	0	1	0	stroma/glands	CK7, CEA, EpCam, B72.3, Leu-M1, Vim, Desmin, Actin, SMA, ER, PR,	0	CP, right-sided	n.s.	not for 10 months
				36	0	1	0	n.s.	yes	n.s.	1	0	0	0	0	1 nodule	0	1	0	0	1	0	stroma/glands	CK7, CEA, EpCam, B72.3, Leu-M1, Vim, Desmin, Actin, SMA, ER, PR,	0	CP, n.s.	n.s.	n.s.
CPH group	Ref	Journal	Case No	Age	Symptoms						Detection				Diaphragm	Nodules/Fibrosis			Endometriosis	Thoracic EM	Thoracic EM	Thoracic EM				Diagnosis		Recurrence
					Chest Pain	Dyspnea (shortness of breath)	Cough	Smoker	recurrent pneumothorax	others	Chest X-Ray	CT	VATS	MRI		(parietal) pleura	Visceral pleura	Lung (s)	Ovary, PE, DIE	Diaphragm	Pleura	Lung	Classification	Markers
	AlAqeel et al. [82]	Int J Surg Case Rep 2019, 61, 271-274	1	34	0	1	0	n.s.	1	infertile	1	1	1	0	fenestration, deposits	deposits	deposits	bullae	0	0	1	0	stroma/glands		0	CP, bilateral	adhesiolysis, resection	recurrence after few months, now free for years
													thoracotomy
	Junejo et al. [83]	Am J Case Rep 2018, 19, 573-576	1	30	1	0	0	n.s.	n.s.	umbilical, abdominal	1	1	1	0	1 nodule	0	0	0	Ov Cyst	1	0	0	stroma/glands		0	CP, right-sided	pleurodesis	recurrence after 6 months
	Furuta et al. [84]	J Thorac Dis 2018, 10, 4801-4805	1	36	0	0	0	n.s.	10 and more	fertile	1	1	0	0	1	0	0	0	unclear	1	0	0	stroma		hemorrhage, macrophages	CP, right-sided	resection	recurrence after 2 months
			9
	Larraín et al. [85]	J Turk Ger Gynecol Assoc 2018, 19, 116-121	5	36	1	0	0	n.s.	1	Dysmenorrhea, fertile	0	0	1	1	fenestration	0	0	0	Bladder, uterosacral ligaments by MRI	1	0	0	stroma/glands		0	CP, right-sided	drainage, hormonal	not for 38 months
				42	1	1	0	n.s.	2	infertile	1	1	1	0	fenestration	0	0	0	0	1	0	0	stroma/glands		0	CP, right-sided	resection	not for 20 weeks
				26	1	1	0	n.s.	1	Dysmenorrhea, pelvic pain, dyspareunia	0	1	1	0	Foci	0	0	0	1 PE	1 Fibrosis	0	0	(Fibrosis)			CP, right-sided	resection	not for 7 years
			not resected	35	0	0	0	n.s.	0	infertile, pelvic pain, Dysmenorrhea, Dyspareunia	0	0	0	0	1	0	0	0	1 DIE uterosacral	1	0	0	not resected			CP, right-sided		not for 55 months
			no CP (?)	40	0	0	0	n.s.	n.s.	infertile, Dysmenorrhea, dyspepsia, nausea	0	1	1	0	1	0	0	0	1	1	0	0	stroma/glands		0	no CP (although endometrial implant was found)	resection	not for 26 months
	Tulandi et al. [86]	J Minim Invasive Gynecol 2018, 25, 480-483	1	34	n.s.	n.s.	n.s.	n.s.	n.s.	n.s.	0	0	1	0	0	n.s.	1	n.s.	1	0	1	0	stroma/glands		9 cases with hemosiderin	CP, right-sided	n.s.	n.s.
		3 of 21	13	27	n.s.	n.s.	n.s.	n.s.	n.s.	n.s.	0	0	1	0	0	n.s.	1	n.s.	1	0	1	0	stroma/glands			CP, right-sided	GnRH	n.s.
			15	45	n.s.	n.s.	n.s.	n.s.	n.s.	n.s.	0	0	1	0	0	n.s.	1	n.s.	0	0	1	0	stroma/glands			CP, right-sided	Dienogest	n.s.
																							7 cases with pleuritis
																							1 case nothing found
	Ottolina et al. [87]	J Minim Invasive Gynecol 2017, 24, 461-465	16	35.3	16	16	16	3 ex-smoker	11/16 with at least 1	7 with dysmenorrhea, pelvic pain, dyspareunia; 3 of them with dyschezia and bowel alterations	0	0	16	0	3 cases	0	0	0	9 cases (2 OV, 1 PE, 1 DIE, 2 DIE/OV, 2 DIE/adenomyosis, 1 with PE/umbilical), 7 not done without endometriotic features				9 stroma/glands		0	14 CP, right-sided	12 with resection/chemical pleurodesis	n.s.
			(21-45)					3 smoker	5/11 with 1	2 infertile					6 with bullae/blebs				6 with PE				7 not positive		0	2 CP, bilateral	2 resection/talc
								10 non-smoker							7 with abnormalities and blebs												2 resection/pleurodesis
															1 with implants												all with hormonal
	Aissa et al. [88]	Pan Afr Med J 2017, 27, 112	1	42	1	1	0	0	n.s.	infertile	1	0	1	0	fenestration/nodule	0	0	nodule	n.s.	1	0	fibrosis	stroma		1	CP, right-sided	resection, abrasion, hormonal	not for 20 months
	Subotic et al. [89]	J Cardiothorac Surg 2016, 11, 66	4	33	1	1	0	n.s.	2	n.s.	0	0	1	0	fenestration	0	0	bullous	n.s.	1	0	0	stroma/glands		0	non-CP, right-sided (although endometrial implant found)	resection	not for 24 months
				33	1	1	0	n.s.	5	n.s.	0	0	1	0	fenestration	0	0	0	n.s.	1	0	0	stroma		0	CP, right-sided	resection	not for 43 months
				49	1	0	0	n.s.	5	n.s.	0	0	1	0	fenestration	0	0	bullous	n.s.	0	0	0	0			CP, right-sided	resection	not for 14 months
			liver herniation	37	1	0	0	n.s.	2	n.s.	0	0	1	0	fenestration	0	0	0	n.s.	0	0	0	0			CP, right-sided	resection	not for 6 months
	Nair & Nayar [90]	J Clin Diagn Res 2016, 10, QR04	1	40	1	1	1	n.s.	1	pleural effusion, myomectomy	1	1	thoracoscopy	1	0	nodules	n.s.	0	adenomyosis	0	1	0	pos (nodules)		0	CP, bilateral	GnRH	not for 12 months
			2	36	1	1	0	n.s.	n.s.	Marfan Syndrome?	1	1	0	0	n.s.	n.s.	n.s.	n.s.	uterine fibroids	0	0	0	uterine fibroids		0	CP, right-sided	pleurodesis	recurrence after 6 months, then free for 24 months
			3	43	0	1	1	n.s.	1		1	1	thoracoscopy	0	n.s.	pos	n.s.	n.s.	n.s.	0	0	0	histiocytes/fibrofatty tissue		0	CP, right-sided	pleurodesis	not for 24 months
			4	34	1	0	0	n.s.	n.s.	marfanoid	1	1	0	0	0	plaque	n.s.	0	adenomyosis	0	1	0	pos		0	CP, right-sided	n.s.	recurrence
			5	45	0	0	0	n.s.	n.s.	pleural effusion, Dysmenorrhea	1	1	0	0	0	adhesions/spots	n.s.	0	uterine fibroids, adenomyosis, ov. Cyst	0	1	0	stromal/glands		1	CP, right-sided	n.s.	recurrence after 6 months, then free for 48 months
			6	23	0	1	1	n.s.	1	pleural effusion	0	1	thoracotomy	0	fenestration, cystic nodules	spots	1	0	OV cyst	1	1	0	stromal		1	CP, bilateral	talc pleurodesis	recurrence after 4 months and 8 months and 3 months, not for 6 months
	Elia et al. [91]	Int J Surg Case Rep 2015, 12, 19-22	1	38	1	1	0	n.s.	3	no pelvic/abdominal pain	1	1	0	1	spot red-purple	0	0	0	0 (by MRI)	1	0	0	stroma/glands		0	CP, right-sided	dienogest	not after 6 months
	Hwang et al. [92]	Obstet Gynecol Sci 2015, 58, 223-231	7	35	n.s.	n.s.	n.s.	0	n.s.	n.s.	0	1	1	0	1	0	0	0	OV Cyst (US)	1	0	0	stroma/glands		1 (macrophages)	CP, right-sided		recurrence
				42	n.s.	n.s.	n.s.	0	n.s.	n.s.	0	1	1	0	1	0	0	0	0	1	0	0	stroma/glands		0	CP, right-sided	GnRH	not for 10 months
				46	n.s.	n.s.	n.s.	0	n.s.	n.s.	0	1	thoracotomy	0	1	0	0	0	PE	1	0	0	stroma/glands		0	CP, right-sided	GnRH	not for 47 months
				48	n.s.	n.s.	n.s.	0	n.s.	n.s.	0	1	1	0	blebs	0	0	0	0	0	0	0	0 fibrosis		0	CP, right-sided		recurrence
				43	n.s.	n.s.	n.s.	0	n.s.	n.s.	0	1	1	0	1	0	0	0	0	1	0	0	stromal		0	CP, right-sided	GnRH	not for 2 months
				40	n.s.	n.s.	n.s.	0	n.s.	n.s.	0	1	1	0	1	0	0	0	0	0	0	0	0			CP, right-sided	GnRH	not for 13 months
				38	n.s.	n.s.	n.s.	0	n.s.	n.s.	0	1	1	0	1	0	0	0	0	0	0	0	0			CP, right-sided	GnRH	not for 9 months
	Takahashi et al. [93]	J Thorac Cardiovasc Surg 2013, 145, 300-302	1	36	0	0	0	n.s.	0	pleural effusion	0	1	1	0	blueberry spots	blueberry spots	blueberry spots	0	n.s.	1	1	1	stroma/glands		0	CP, right-sided	GnRH, Pleurodesis	recurrence after 24 months, then not for 24 months
	Roberts et al. [94]	JSLS 2003, 7, 371-375	1	28	1	0	0	n.s.	n.s.	pelvic pain, constipation, bloody stool	1	1	thoracoscopy	0	1	bleb	0	0	rectum	1	1	0	stroma/glands		0	CP, right-sided	resection	recurrence after 5 months
	Redwine [95]	Fertil Steril 2002, 27, 288-296	3	34	1	1	0	n.s.	n.s.	n.s.	n.s.	n.s.	n.s.	n.s.	1 nodules	0	0	0	1 PE, intestine	1	0	0	stroma/glands		0 (hemorrhage)	CP, right-sided	resection	not for 6.4 months
			1 of 8
	Blanco et al. [96]	J Thorac Cardiovasc Surg 1998, 116, 179-180	1	33	1	1	0	n.s.	1	n.s.	1	1	1	1	1	0	0	1 bullae	n.s.	1	0	0	stroma/glands/fibrosis		0	CP, right-sided	GnRH	not for 12 months
PE=peritoneal endometriosis
OV= Ovary/ovarian endometriosis
DIE= deep infiltrating endometriosis
n.s.=not stated
pos.=positive
EM=endometriosis

## Sheet: Tabelle2
			75.3989
